# Supplementary material for: Sensitive detection of prion protein through long range resonance energy transfer between graphene oxide and molecular aptamer beacon
Source: Royal Society of Chemistry journal article supplement (doi:10.1039/c2ay26156a), 2012-11-06
Supplement: c2ay26156a.pdf [file c2ay26156a.pdf]

## Supplementary Material

Sensitive detection of prion protein through long range resonance energy transfer between graphene oxide and molecular aptamer beacon

Hong Lin Zhuang,<sup>a</sup> Shu Jun Zhen,<sup>a</sup> Jian Wang,<sup>b</sup> Cheng Zhi Huang<sup>a,b\*</sup>

<sup>a</sup> College of Chemistry and Chemical Engineering, <sup>b</sup> and College of Pharmaceutical Sciences, Education Ministry Key Laboratory on Luminescence and Real-Time Analysis, Southwest University, Chongqing, 400715, China

\*corresponding author: Tel: +86 23 68254659; fax: +86 23 68866796.

E-mail address: [chengzhi@swu.edu.cn](mailto:chengzhi@swu.edu.cn) (C.Z. Huang).

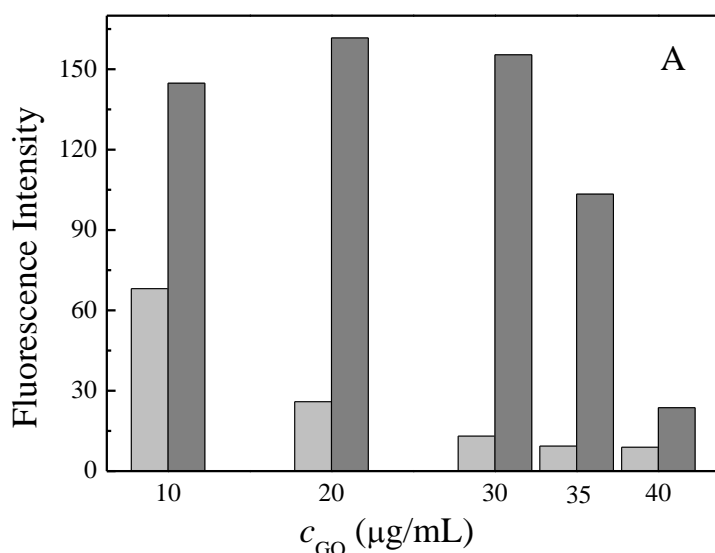

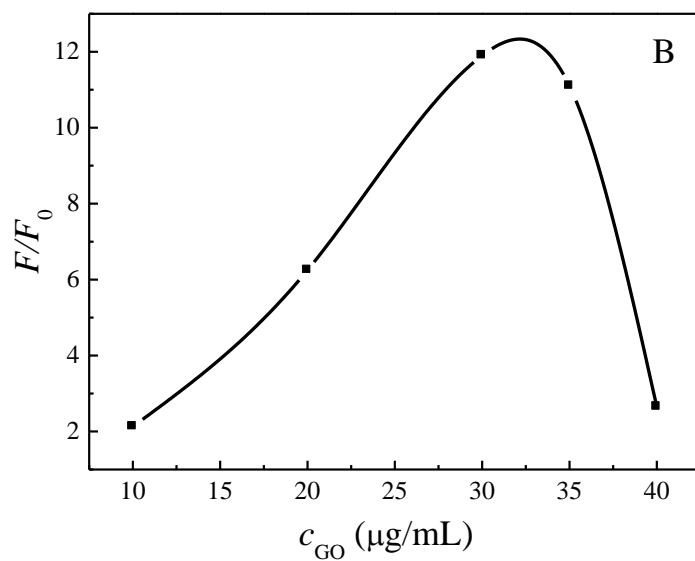

**Figure S1.** Effect of GO concentration on the fluorescence intensity of MAB in the absence (A, light gray) and in the presence of  $20.5 \mu\text{g/mL PrP}^C$  (A, dark gray). Fluorescence enhancement ( $F/F_0$ ) of MAB by using  $20.5 \mu\text{g/mL PrP}^C$  as a function of GO concentration (B). Experimental conditions: MAB  $50 \text{ nM}$ . Excitation:  $525 \text{ nm}$ .
